# Supplementary material
Source: Springer Nature journal article supplement (https://www.springermedizin.de/resource/supplementary/13075_2013_4258_MOESM1_ESM.pdf/9696210)

**A**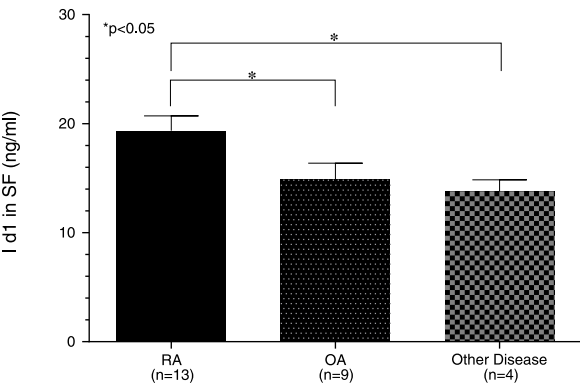**B**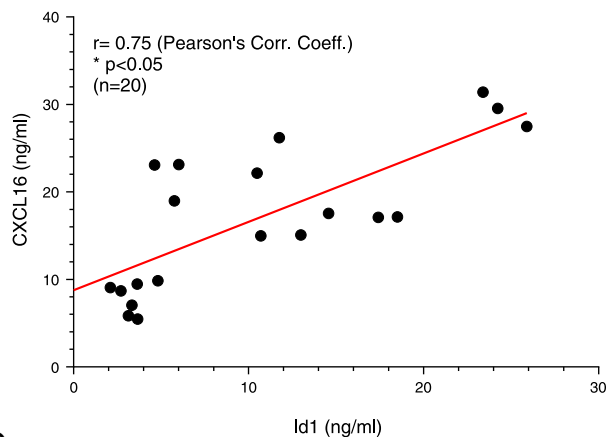**C**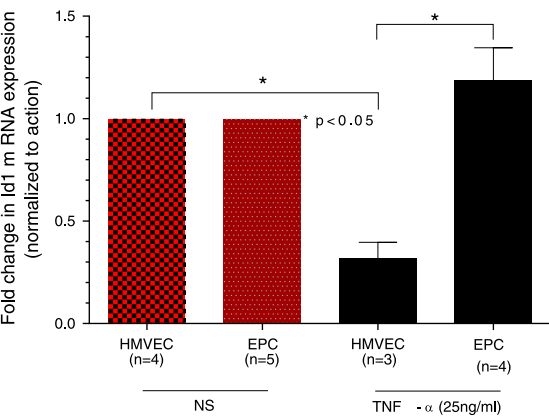**D**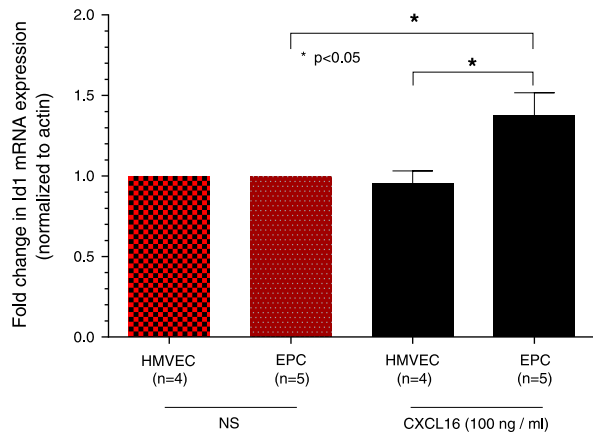

Supplement: MOESM1 [file 9696210]
